# Supplementary material
Source: Research Square preprint supplement (doi:10.21203/rs.3.rs-9574288/v1)
Supplement: Supplementary file 2 [file 51247bdfc3842396a2d370a0.xlsx]

## Sheet: Supplementary Table 2
Panel name	Marker combinations defining distinct immune cell populations
Memory T cells	CD3 /CCR7+CD45RO+ | Freq. of Parent
	CD3 /CCR7+CD45RO+ | Geometric Mean (PD-1 APC-A)
	CD3 /CCR7+CD45RO+ /PD-1 total | Freq. of Parent
	CD3 /CCR7- CD45RO+ | Freq. of Parent
	CD3 /CCR7- CD45RO+ | Freq. of Parent
	CD3 /CCR7- CD45RO+ | Geometric Mean (PD-1 APC-A)
	CD3 /CCR7- CD45RO+ /PD-1 total | Freq. of Parent
	CD3 /CD4 Positive | Freq. of Parent
	CD3 /CD4 Positive | Geometric Mean (PD-1 APC-A)
	CD3 /CD4 Positive/CCR7+CD45RO+ | Freq. of Parent
	CD3 /CD4 Positive/CCR7+CD45RO+ | Geometric Mean (PD-1 APC-A)
	CD3 /CD4 Positive/CCR7+CD45RO+ /PD-1 total | Freq. of Parent
	CD3 /CD4 Positive/CCR7- CD45RO+ | Freq. of Parent
	CD3 /CD4 Positive/CCR7- CD45RO+ | Geometric Mean (PD-1 APC-A)
	CD3 /CD4 Positive/CCR7- CD45RO+ /PD-1 total | Freq. of Parent
	CD3 /CD4 Positive/PD-1 total | Freq. of Parent
Exhausted T cells	CD3 Pos | Geometric Mean (KLRG-1 FITC-A)
	CD3 Pos | Geometric Mean (LAG-3 PE-A)
	CD3 Pos | Geometric Mean (LAG-3 PE-A)
	CD3 Pos | Geometric Mean (ICOS PC5.5-A)
	CD3 Pos | Geometric Mean (PD-1 APC-A)
	CD3 Pos/ICOS-1 | Freq. of Parent
	CD3 Pos/ICOS-1/PD-1 | Freq. of Parent
	CD3 Pos/KLRG-1 | Freq. of Parent
	CD3 Pos/KLRG-1 | Geometric Mean (PD-1 APC-A)
	CD3 Pos/KLRG-1 /PD-1 | Freq. of Parent
	CD3 Pos/LAG-3 | Freq. of Parent
	CD3 Pos/LAG-3 | Geometric Mean (PD-1 APC-A)
	CD3 Pos/LAG-3 /PD-1 | Freq. of Parent
NK cells	CD3+CD56+ cells | Freq. of Parent
	CD3+CD56+ cells | Geometric Mean (PD-1 FITC-A)
	CD3+CD56+ cells | Geometric Mean (CD16 PE-A)
	CD3+CD56+ cells/CD16 | Freq. of Parent
	CD3+CD56+ cells/CD16 | Geometric Mean (CD16 PE-A)
	CD3+CD56+ cells/PD-1 | Freq. of Parent
	CD3+CD56+ cells/PD-1 | Geometric Mean (PD-1 FITC-A)
	CD3+CD56+ cells/TIM3 | Freq. of Parent
	NK cells CD3- CD56 High | Freq. of Parent
	NK cells CD3- CD56 High | Geometric Mean (PD-1 FITC-A)
	NK cells CD3- CD56 High | Geometric Mean (CD16 PE-A)
	NK cells CD3- CD56 High/CD16 | Geometric Mean (CD16 PE-A)
	NK cells CD3- CD56 High/PD-1 | Freq. of Parent
	NK cells CD3- CD56 High/TIM3 | Freq. of Parent
	NK cells CD3- CD56 Low | Freq. of Parent
	NK cells CD3- CD56 Low | Geometric Mean (PD-1 FITC-A)
	NK cells CD3- CD56 Low | Geometric Mean (CD16 PE-A)
	NK cells CD3- CD56 Low /CD16 | Freq. of Parent
	NK cells CD3- CD56 Low /CD16 | Geometric Mean (CD16 PE-A)
	NK cells CD3- CD56 Low /PD-1 | Freq. of Parent
	NK cells CD3- CD56 Low /PD-1 | Geometric Mean (PD-1 FITC-A)
	NK cells CD3- CD56 Low /TIM3 | Freq. of Parent
	T cells CD3+CD56- | Freq. of Parent
	T cells CD3+CD56- | Geometric Mean (PD-1 FITC-A)
	T cells CD3+CD56-/CD16 | Freq. of Parent
	T cells CD3+CD56-/CD16 | Geometric Mean (CD16 PE-A)
	T cells CD3+CD56-/PD-1 | Freq. of Parent
	T cells CD3+CD56-/PD-1 | Geometric Mean (PD-1 FITC-A)
	T cells CD3+CD56-/TIM3 | Freq. of Parent
	Total NK cells-CD3-CD56+ | Freq. of Parent
	Total NK cells-CD3-CD56+ | Geometric Mean (PD-1 FITC-A)
	Total NK cells-CD3-CD56+/CD16 | Freq. of Parent
	Total NK cells-CD3-CD56+/CD16 | Geometric Mean (CD16 PE-A)
	Total NK cells-CD3-CD56+/PD-1 | Freq. of Parent
	Total NK cells-CD3-CD56+/PD-1 | Geometric Mean (PD-1 FITC-A)
	Total NK cells-CD3-CD56+/TIM3 | Freq. of Parent
Hyporesponsive NK cells	Lymphocytes/CD3+CD56+ cells | Freq. of Parent
	Lymphocytes/CD3+CD56+ cells | Geometric Mean (PD-1 FITC-A)
	Lymphocytes/CD3+CD56+ cells/CD16 | Freq. of Parent
	Lymphocytes/CD3+CD56+ cells/CD16 | Geometric Mean (CD16 PC5.5-A)
	Lymphocytes/CD3+CD56+ cells/KIR+NKG2A+ | Freq. of Parent
	Lymphocytes/CD3+CD56+ cells/KIR+NKG2A+ | Geometric Mean (PD-1 FITC-A)
	Lymphocytes/CD3+CD56+ cells/KIR+NKG2A+ /CD16 | Freq. of Parent
	Lymphocytes/CD3+CD56+ cells/KIR+NKG2A+ /CD16 | Geometric Mean (CD16 PC5.5-A)
	Lymphocytes/CD3+CD56+ cells/KIR+NKG2A+ /PD-1 | Freq. of Parent
	Lymphocytes/CD3+CD56+ cells/KIR+NKG2A+ /PD-1 | Geometric Mean (PD-1 FITC-A)
	Lymphocytes/NK cells CD3- CD56 High | Freq. of Parent
	Lymphocytes/NK cells CD3- CD56 High | Geometric Mean (PD-1 FITC-A)
	Lymphocytes/NK cells CD3- CD56 High/CD16 | Freq. of Parent
	Lymphocytes/NK cells CD3- CD56 High/CD16 | Geometric Mean (CD16 PC5.5-A)
	Lymphocytes/NK cells CD3- CD56 High/KIR+NKG2A+ | Freq. of Parent
	Lymphocytes/NK cells CD3- CD56 High/KIR+NKG2A+ | Geometric Mean (PD-1 FITC-A)
	Lymphocytes/NK cells CD3- CD56 High/KIR+NKG2A+ /CD16 | Freq. of Parent
	Lymphocytes/NK cells CD3- CD56 High/KIR+NKG2A+ /CD16 | Geometric Mean (CD16 PC5.5-A)
	Lymphocytes/NK cells CD3- CD56 High/KIR+NKG2A+ /PD-1 | Freq. of Parent
	Lymphocytes/NK cells CD3- CD56 High/KIR+NKG2A+ /PD-1 | Geometric Mean (PD-1 FITC-A)
	Lymphocytes/NK cells CD3- CD56 High/PD-1 | Freq. of Parent
	Lymphocytes/NK cells CD3- CD56 High/PD-1 | Geometric Mean (PD-1 FITC-A)
	Lymphocytes/NK cells CD3- CD56 Low | Freq. of Parent
	Lymphocytes/NK cells CD3- CD56 Low | Geometric Mean (PD-1 FITC-A)
	Lymphocytes/NK cells CD3- CD56 Low /CD16 | Freq. of Parent
	Lymphocytes/NK cells CD3- CD56 Low /CD16 | Geometric Mean (CD16 PC5.5-A)
	Lymphocytes/NK cells CD3- CD56 Low /KIR+NKG2A+ | Freq. of Parent
	Lymphocytes/NK cells CD3- CD56 Low /KIR+NKG2A+ | Geometric Mean (PD-1 FITC-A)
	Lymphocytes/NK cells CD3- CD56 Low /KIR+NKG2A+ /CD16 | Freq. of Parent
	Lymphocytes/NK cells CD3- CD56 Low /KIR+NKG2A+ /CD16 | Geometric Mean (CD16 PC5.5-A)
	Lymphocytes/NK cells CD3- CD56 Low /KIR+NKG2A+ /PD-1 | Freq. of Parent
	Lymphocytes/NK cells CD3- CD56 Low /KIR+NKG2A+ /PD-1 | Geometric Mean (PD-1 FITC-A)
	Lymphocytes/NK cells CD3- CD56 Low /PD-1 | Freq. of Parent
	Lymphocytes/NK cells CD3- CD56 Low /PD-1 | Geometric Mean (PD-1 FITC-A)
	Lymphocytes/Total NK cells-CD3-CD56+ | Freq. of Parent
	Lymphocytes/Total NK cells-CD3-CD56+ | Geometric Mean (PD-1 FITC-A)
	Lymphocytes/Total NK cells-CD3-CD56+/CD16 | Freq. of Parent
	Lymphocytes/Total NK cells-CD3-CD56+/CD16 | Geometric Mean (CD16 PC5.5-A)
	Lymphocytes/Total NK cells-CD3-CD56+/KIR+NKG2A+ | Freq. of Parent
	Lymphocytes/Total NK cells-CD3-CD56+/KIR+NKG2A+ | Geometric Mean (PD-1 FITC-A)
	Lymphocytes/Total NK cells-CD3-CD56+/KIR+NKG2A+ /CD16 | Freq. of Parent
	Lymphocytes/Total NK cells-CD3-CD56+/KIR+NKG2A+ | Geometric Mean (PD-1 FITC-A)
	Lymphocytes/Total NK cells-CD3-CD56+/KIR+NKG2A+ /CD16 | Freq. of Parent
	Lymphocytes/Total NK cells-CD3-CD56+/KIR+NKG2A+ /CD16 | Geometric Mean (CD16 PC5.5-A)
	Lymphocytes/Total NK cells-CD3-CD56+/KIR+NKG2A+ /PD-1 | Freq. of Parent
	Lymphocytes/Total NK cells-CD3-CD56+/KIR+NKG2A+ /PD-1 | Geometric Mean (PD-1 FITC-A)
	Lymphocytes/Total NK cells-CD3-CD56+/KIR-NKG2A- | Freq. of Parent
	Lymphocytes/Total NK cells-CD3-CD56+/KIR-NKG2A- | Geometric Mean (PD-1 FITC-A)
	Lymphocytes/Total NK cells-CD3-CD56+/KIR-NKG2A- /CD16 | Freq. of Parent
	Lymphocytes/Total NK cells-CD3-CD56+/KIR-NKG2A- /CD16 | Geometric Mean (CD16 PC5.5-A)
	Lymphocytes/Total NK cells-CD3-CD56+/KIR-NKG2A- /PD-1 | Freq. of Parent
	Lymphocytes/Total NK cells-CD3-CD56+/KIR-NKG2A- /PD-1 | Geometric Mean (PD-1 FITC-A)
	Lymphocytes/Total NK cells-CD3-CD56+/PD-1 | Freq. of Parent
	Lymphocytes/Total NK cells-CD3-CD56+/PD-1 | Geometric Mean (PD-1 FITC-A)
Foxp3 Tregs	/CD3 | Freq. of Parent
	/CD3 | Geometric Mean (Ki-67 PE-A)
	/CD3/CD4 Pos | Freq. of Parent
	/CD3/CD4 Pos | Geometric Mean (Ki-67 PE-A)
	/CD3/CD4 Pos | Geometric Mean (PD-1 APC-A)
	/CD3/CD4 Pos/Foxp3 | Freq. of Parent
	/CD3/CD4 Pos/Foxp3 | Geometric Mean (Ki-67 PE-A)
	/CD3/CD4 Pos/Foxp3 | Geometric Mean (PD-1 APC-A)
	/CD3/CD4 Pos/Foxp3 /PD-1+Ki67+ | Freq. of Parent
	/CD3/CD4 Pos/Foxp3 /PD-1-Ki67+ | Freq. of Parent
	/CD3/CD4 Pos/PD-1+Ki67+ | Freq. of Parent
	/CD3/CD4 Pos/PD-1-Ki67+ | Freq. of Parent
	/CD3/CD4 Pos/PD-1-Ki67- | Freq. of Parent

## Sheet: Supplementary Table 4
Test Category	Abbreviation	Test Name/Description
Neuropsychiatric Symptoms Questionnaires		Delusions
		Hallucinations
		Agitation/Agression
		Depression/Dysphoria
		Anxiety
		Elation/Euphoria
		Apathy/Indifference
		Desinhibition
		Irritability/lability
		Motor disturbance
		Nightime behaviors
		Appetite/eating
		NPI Total score
		NPI Caregiver Distress score
		Anxiety Hamilton
		GDS Depression
Neuropsychology		Years of education
Global Cognitive Function	MMSE	Mini mental state examination (7s)
		Word Association Test
Memory	FCSRT_FL	Free and Cued Selective Reminding Test_ Free Learning
	FCSRT_TL	Free and cued Selective Reminding Test_ Total Learning
	FCSRT_DFR	Free and cued Selective Reminding Test_ Deleyed Free Recall
	FCSRT_DTR	Free and cued Selective Reminding Test_ Deleyed Total Recall
	ROCF_IR	Rey Osterrieth Complex Figure_Immediate Recall
	ROCF_DR	Rey Osterrieth Complex Figure_Deleyed Recall
	CERAD_CPR	The Consortium to Establish a Registry for Alzheimer's Disease_ copy praxis recall
Language	BNT	Boston Naming Test
	BNT_PhC	Boston Naming Test_phonetic clue
	BNT_Time	Boston Naming Test_Time
	BNT_NN	Boston Naming Test_Neuronorma
	Semantic_fluency
	Comprehension_BDAE	Comprehension_Boston Diagnostic Aphasia Examination
	Repetition_BDAE_LF	Repetition_Boston Diagnostic Aphasia Examination_Low Frequency
	Repetition_BDAE_HF	Repetition_Boston Diagnostic Aphasia Examination_High Frequency
	Repetition_BDAE	Repetition_Boston Diagnostic Aphasia Examination
Praxis	CERAD_CP	The Consortium to Establish a Registry for Alzheimer's Disease_ copy praxis
	WAB_Praxis	Western Aphasia Battery_Praxis
	ROCF_Copy	Rey Osterrieth Complex Figure_Copy
	ROCF_Time	Rey Osterrieth Complex Figure_Time
	ROCF_Type	Rey Osterrieth Complex Figure_Type
Visual perception and spatial processing	VOSP_letters	Visual Object and Space Perception_Letters
	VOSP_numbers	Visual Object and Space Perception_Numbers
	VOSP_objects	Visual Object and Space Perception_Objects
Executive function	TMT_A	Trail Making Test_A
	TMT_B	Trail Making Test_B
	SDMT	Symbol Digit Modalities Test
	FAS_Fluency	FAS Word Fluency
	P_Fluency
	Stroop_W	Stroop_Word
	Stroop_C	Stroop_Color
	Stroop_CW	Stroop_Word
	Digits_F	Digits_Forward
	Digit_Span_F	Digit_Span_Forward
	Digits_B	Digits_Backwards
	Digit_Span_B	Digit_Span_Backwards
Digital Cognitive Assessment	Altoida

## Sheet: Supplementary Table 5
KEGG Pathway ID	Pathway Name
hsa04657	IL-17 signaling pathway
hsa04066	HIF-1 signaling pathway
hsa04380	Osteoclast differentiation
hsa04723	Retrograde endocannabinoid signaling
hsa04210	Apoptosis
hsa04520	Adherens junction
hsa04514	Cell adhesion molecules (CAMs)
hsa04022	cGMP-PKG signaling pathway
hsa04915	Estrogen signaling pathway
hsa04217	Necroptosis
hsa04728	Dopaminergic synapse

## Sheet: Supplementary Table 6
GO ID	Term Name
GO:0001783	B cell apoptotic process
GO:0002903	negative regulation of B cell apoptotic process
GO:0032703	negative regulation of interleukin-2 production
GO:1901857	positive regulation of cellular respiration
GO:0032733	positive regulation of interleukin-10 production
GO:0051607	defense response to virus
GO:0032735	positive regulation of interleukin-12 production
GO:0042130	negative regulation of T cell proliferation
GO:0031334	positive regulation of protein-containing complex assembly
GO:0050729	positive regulation of inflammatory response
GO:0051770	obsolete positive regulation of nitric-oxide synthase biosynthetic process
GO:1903078	positive regulation of protein localization to plasma membrane
GO:0050868	negative regulation of T cell activation
GO:0006968	cellular defense response
GO:0150076	neuroinflammatory response
GO:0031295	T cell costimulation
GO:0071222	cellular response to lipopolysaccharide
GO:0050796	regulation of insulin secretion
GO:0032760	positive regulation of tumor necrosis factor production
GO:0010508	positive regulation of autophagy
GO:0002517	T cell tolerance induction
GO:0050766	positive regulation of phagocytosis
GO:0001824	blastocyst development
GO:0032755	positive regulation of interleukin-6 production
GO:0019827	stem cell population maintenance
GO:0032689	negative regulation of type II interferon production
GO:0042531	positive regulation of tyrosine phosphorylation of STAT protein

## Sheet: Supplementary Table 8
Panel name	Marker combination	Attribute	MCI vs HC	AD vs HC	AD vs MCI
Panel 10 Foxp3 Tregs		Freq. of Parent			↑
	/CD3/CD4 Pos/Foxp3	Geometric Mean (Ki-67 PE-A)			↑
	/CD3/CD4 Pos/Foxp3	Geometric Mean (PD-1 APC-A)			↑
	/CD3/CD4 Pos/Foxp3 /PD-1+Ki67+	Freq. of Parent			↑
	/CD3/CD4 Pos/Foxp3 /PD-1-Ki67+	Freq. of Parent			↑
	/CD3/CD4 Pos/Foxp3 /PD-1-Ki67-	Freq. of Parent			↓
Panel 3 Exhausted T cells	CD3 Pos	Freq. of Parent		↓	↓
Panel 8 NK cells	NK cells CD3- CD56 Low	Freq. of Parent		↑	↑
	T cells CD3+CD56-	Freq. of Parent		↓	↓
	Total NK cells-CD3-CD56+	Freq. of Parent		↑	↑
Panel 9 Hyporesponsive NK cells	Lymphocytes/CD3+CD56+ cells/KIR+NKG2A+ /PD-1	Geometric Mean (PD-1 FITC-A)	↓		↑
	Lymphocytes/CD3+CD56+ cells/PD-1	Geometric Mean (PD-1 FITC-A)	↓		↓
	Lymphocytes/NK cells CD3- CD56 Low	Freq. of Parent		↑	↑
	Lymphocytes/T cells CD3+CD56-	Freq. of Parent		↓	↑
	Lymphocytes/T cells CD3+CD56-/KIR+NKG2A+	Freq. of Parent		↑
	Lymphocytes/T cells CD3+CD56-/KIR+NKG2A+ /PD-1	Geometric Mean (PD-1 FITC-A)		↓
	Lymphocytes/T cells CD3+CD56-/KIR-NKG2A-	Freq. of Parent		↓
	Lymphocytes/Total NK cells-CD3-CD56+	Freq. of Parent		↑	↑
